# Supplementary material for: Evaluation of Lower Leg Arteries and Fibular Perforators before Microsurgical Fibular Transfer Using Noncontrast-Enhanced Quiescent-Interval Slice-Selective (QISS) Magnetic Resonance Angiography
Source: MDPI journal article supplement (doi:10.3390/jcm12041634), 2023-02-18
Supplement: s1 [file s1]

## Supplementary Files

**Table S1.** Protocol parameters of noncontrast enhanced 2D ECG-triggered QISS-MRA.

| Parameters                             | Values/Setting                                                 |
|----------------------------------------|----------------------------------------------------------------|
| Imaging mode                           | 2D                                                             |
| TR (ms)                                | 667.6                                                          |
| TE (ms)                                | 1.7                                                            |
| Acquisition matrix (Px)                | 400 × 400                                                      |
| Reconstructed pixel (mm <sup>2</sup> ) | 0.5 × 0.5                                                      |
| In-plane interpolation                 | On                                                             |
| Slice thickness (mm)                   | 3                                                              |
| Number of slices per slab              | 60                                                             |
| Slice distance factor (%)              | -20                                                            |
| Number of averages                     | 1                                                              |
| Receiver bandwidth (Hz/Px)             | 658                                                            |
| Flip angle (°)                         | 120                                                            |
| Slice orientation                      | Transverse                                                     |
| Phase oversampling (%)                 | 0                                                              |
| Filter                                 | Raw data, distortion correction<br>(2D); prescan<br>normalizer |
| B <sub>0</sub> shim mode               | Standard                                                       |

|                                                            |                               |
|------------------------------------------------------------|-------------------------------|
| Asymmetrical echo                                          | Weak                          |
| RF pulse type                                              | Normal                        |
| pulse length (ms)                                          | 2.56                          |
| Gradient mode                                              | Fast                          |
| Maximum amplitude (mT/m)                                   | 24                            |
| Maximum rise time ( $\mu\text{s/mT/s}$ )                   | 5.55                          |
| Maximum slew rate (mT/m/ms)                                | 180.2                         |
| iPAT modus (acceleration factor/number of reference lines) | GRAPPA (2/24)                 |
| Partial Fourier (phase and slice)                          | 5/8                           |
| Thickness of venous saturation slab (mm)                   | 75                            |
| TI (ms)                                                    | 345                           |
| TD (ms)                                                    | 100                           |
| Acquisition time per slice (s)                             | <1                            |
|                                                            | Depended on the cardiac cycle |

---

TR = repetition time, TE = echo time, Px = pixel, Hz = Hertz, RF = radiofrequency, iPAT = integrated parallel imaging technique, GRAPPA = GeneRalized Autocalibrating Partial Parallel Acquisition, TI = time from in-plane and venous saturation to acquisition of central k-space ( $ky=0$ ), TD = trigger delay.

### **Calculation of the apparent signal-to-noise ratio (SNR) and the apparent contrast-to-noise ratio (CNR)**

Nine circular regions of interest (ROIs) of appropriate size in relation to the cross-sectional areas of the corresponding vessels were placed in the aorta ( $ROI_{Aorta}$ , 2.0 cm above the aortic bifurcation with a size of 100 mm<sup>2</sup>), in the right and left popliteal artery ( $ROI_{PA}$ , at the level of the knee joint space, 20 mm<sup>2</sup>), and in the three arteries of the right and left lower leg ( $ROI_{AT}$ ,  $ROI_{PT}$ ,  $ROI_{FA}$ , each at the same level, measured 1 cm below the bifurcation of the tibiofibular trunk, 6 mm<sup>2</sup>). Here, the anterior tibial artery is abbreviated as AT, posterior tibial artery as PT, and fibular artery as FA.

In addition, three  $ROI_{Air}$  were drawn in the background without visual imaging artifacts at the same level of  $ROI_{Aorta}$ ,  $ROI_{PA}$  and  $ROI_{AT/PT/FA}$  to determine the SNR. All three  $ROI_{Air}$  were the same size as the ROI in the corresponding artery. In addition, two ROIs were placed in the right and left tibialis anterior muscle ( $ROI_{Muscle}$ , 6 mm<sup>2</sup>) to calculate the CNR of AT, PT, and FA.

**Table S2.** Correlation of different variables with surgical complications.

| <b>Variable</b>                   | <b>Phi-Value</b> | <b>Rho-Value</b> | <b><i>p</i>-Value</b> |
|-----------------------------------|------------------|------------------|-----------------------|
| Gender                            | 0.007            |                  | 1                     |
| Hypercholesterolemia              | -0.021           |                  | 1                     |
| Smoking                           | 0.007            |                  | 1                     |
| Arterial hypertension             | 0.021            |                  | 1                     |
| Diabetes                          | -0.021           |                  | 1                     |
| Obesity                           | -0.226           |                  | 0.36                  |
| Grading of Right FA               |                  | -0.026           | 0.86                  |
| Grading of Left FA                |                  | -0.014           | 0.93                  |
| Presence of Perforators Right Leg |                  | 0.162            | 0.27                  |
| Presence of Perforators Left Leg  |                  | 0.226            | 0.11                  |
| Number of Perforators Right Leg   |                  | 0.103            | 0.49                  |
| Number of Perforators Left Leg    |                  | 0.184            | 0.20                  |
